# Supplementary material for: The structure and unzipping behavior of dumbbell and hairpin DNA revealed by real-time nanopore sensing
Source: Royal Society of Chemistry journal article supplement (doi:10.1039/d0nr08729g), 2021-01-01
Supplement: d0nr08729g1.pdf [file d0nr08729g1.pdf]

# **Structure and unzipping behavior of dumbbell and hairpin DNA revealed by real-time nanopore sensing**

**Xinqiong Li<sup>#</sup>, Guiqin Song<sup>#</sup>, Linqin Dou<sup>#</sup>, Shixin Yan, Ming Zhang, Weidan Yuan, Shirong  
Lai, Xin Jiang, Kaiju Li, Ke Sun, Changjian Zhao, Jia Geng\***

*Department of Laboratory Medicine, State Key Laboratory of Biotherapy and Cancer Center, West  
China Hospital, Sichuan University and Collaborative Innovation Center, Chengdu 610041, China*

\* Corresponding Author

<sup>#</sup> These authors contributed equally to this work

*E-mail addresses: geng.jia@scu.edu.cn (J. Geng)*

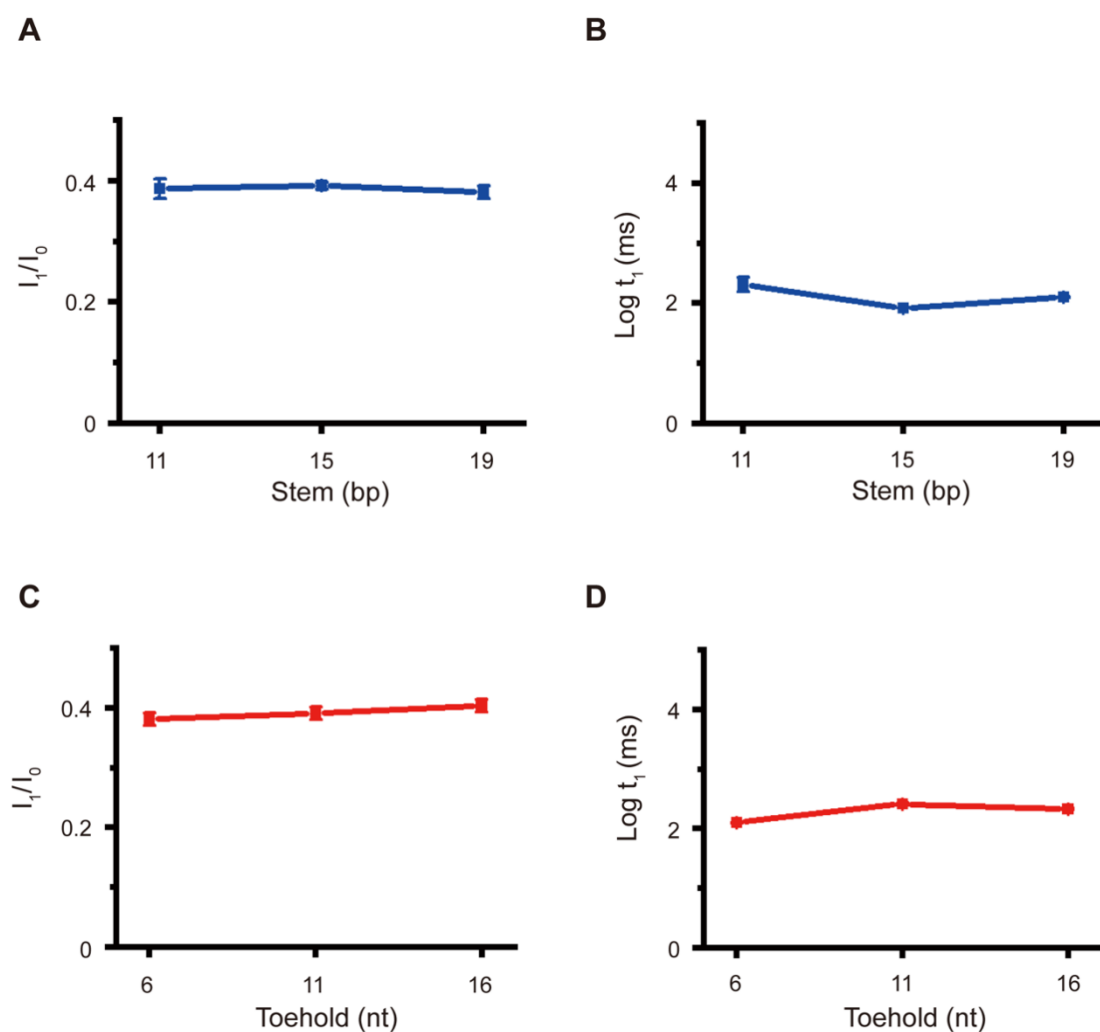

**Fig. S1.** Analysis of hairpin DNA with different stem and toehold length in the MspA nanopore. (A) (C) line chart of current blockage events ( $n=3$ ). (B) (D) line chart of dwell time ( $n=3$ ). Error bar equals standard deviation. The recording voltage was 120 mV with the buffer condition: *cis*: 0.5 M NaCl, 10 mM Tris, pH 8.0; *trans*: 3 M NaCl, 10 mM Tris pH 8.0.

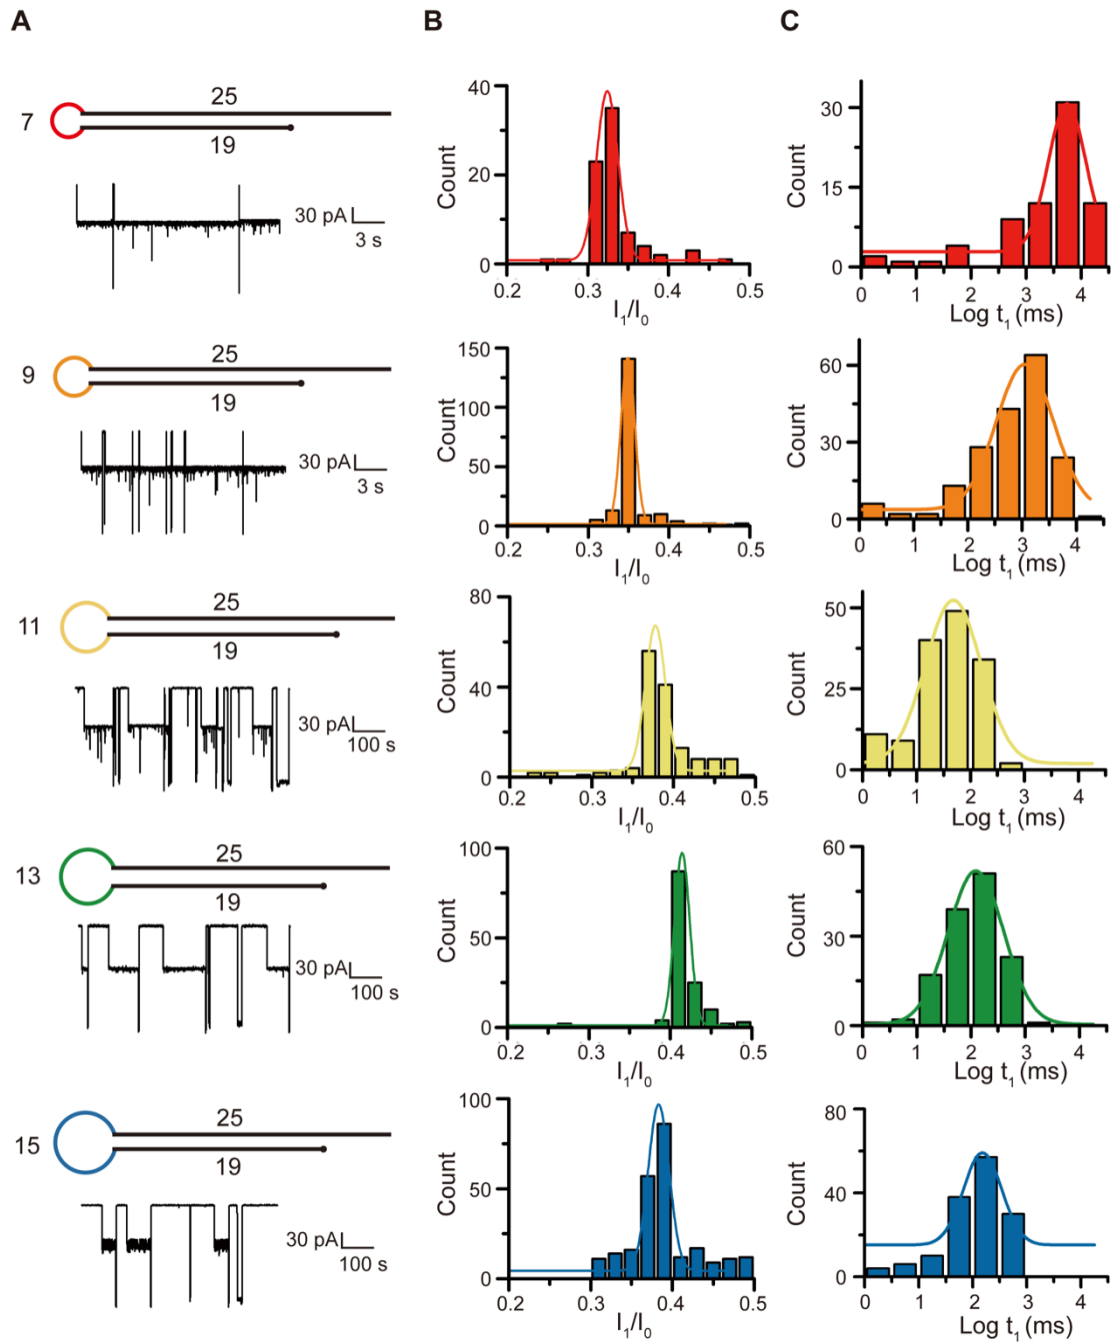

**Fig. S2.** Detection of hairpin DNA with different loop through the MspA nanopore (level 1). (A) The structure and current trace of hairpin DNA. (B) Histograms of current blockage. (C) Histograms of dwell time. The recording voltage was 120 mV with the buffer condition: *cis*: 0.5 M NaCl, 10 mM Tris, pH 8.0; *trans*: 3 M NaCl, 10 mM Tris pH 8.0.

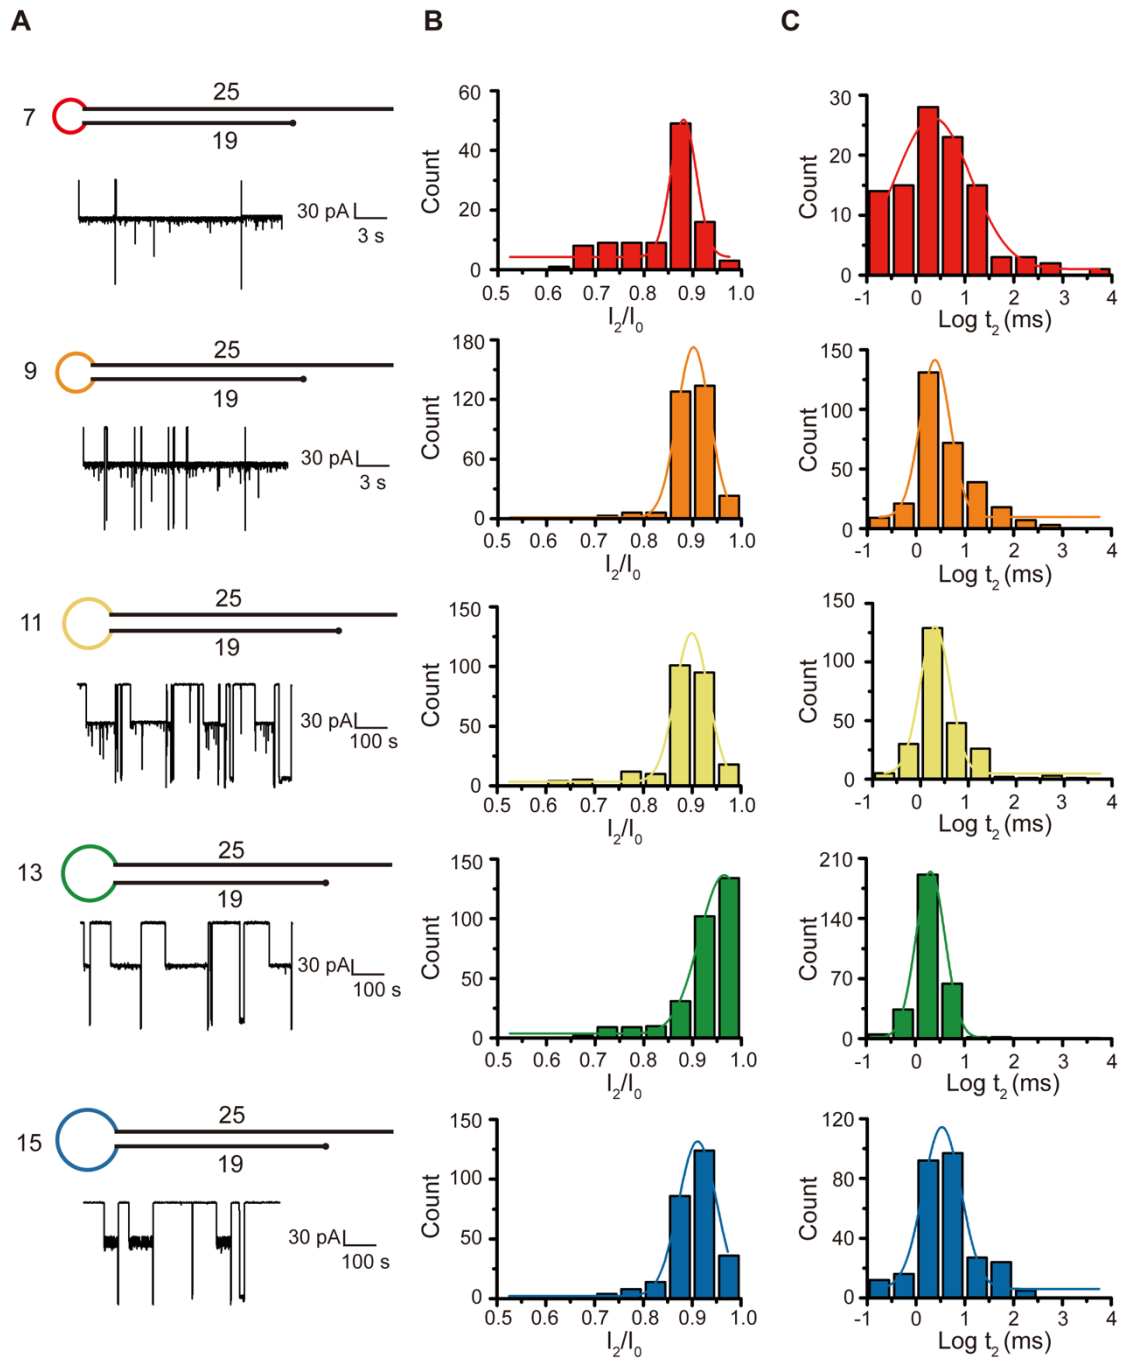

**Fig. S3.** Detection of hairpin DNA with different loop through the MspA nanopore (level 2). (A) The structure and current trace of hairpin DNA. (B) Histograms of current blockage. (C) Histograms of dwell time. The recording voltage was 120 mV with the buffer condition: *cis*: 0.5 M NaCl, 10 mM Tris, pH 8.0; *trans*: 3 M NaCl, 10 mM Tris pH 8.0.

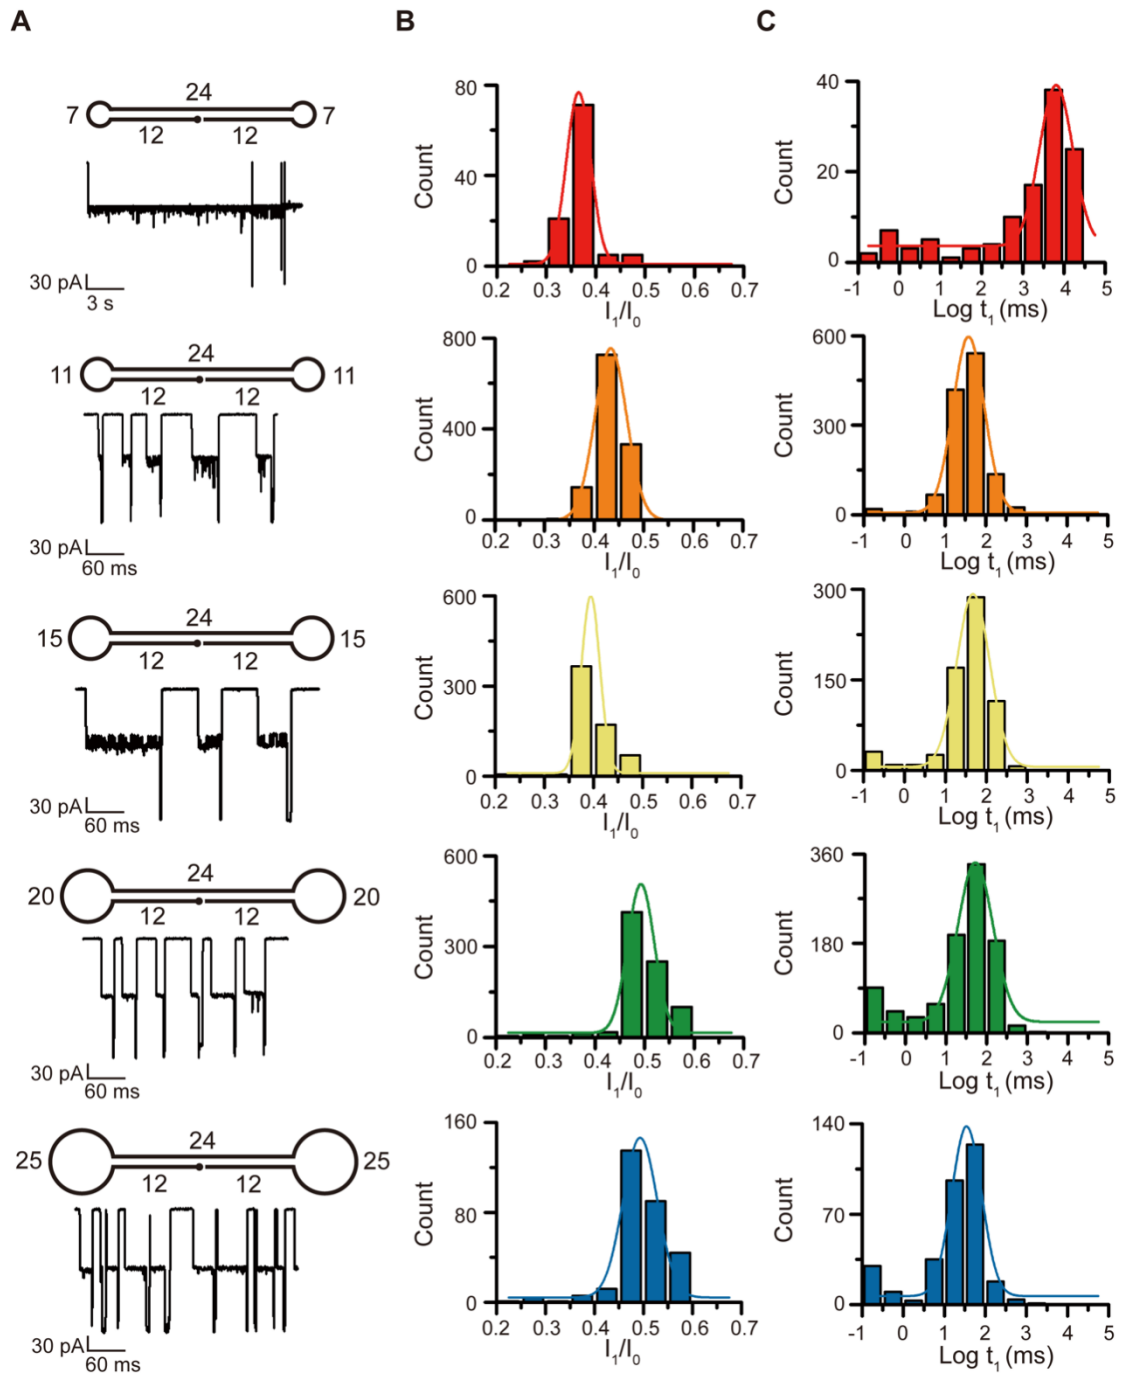

**Fig. S4.** Detection of dumbbell structure DNA with different loop through the MspA nanopore (level 1). (A) The structure and current trace of dumbbell DNA. (B) Histograms of current blockage. (C) Histograms of dwell time. The recording voltage was 120 mV with the buffer condition: *cis*: 0.5 M NaCl, 10 mM Tris, pH 8.0; *trans*: 3 M NaCl, 10 mM Tris pH 8.0.

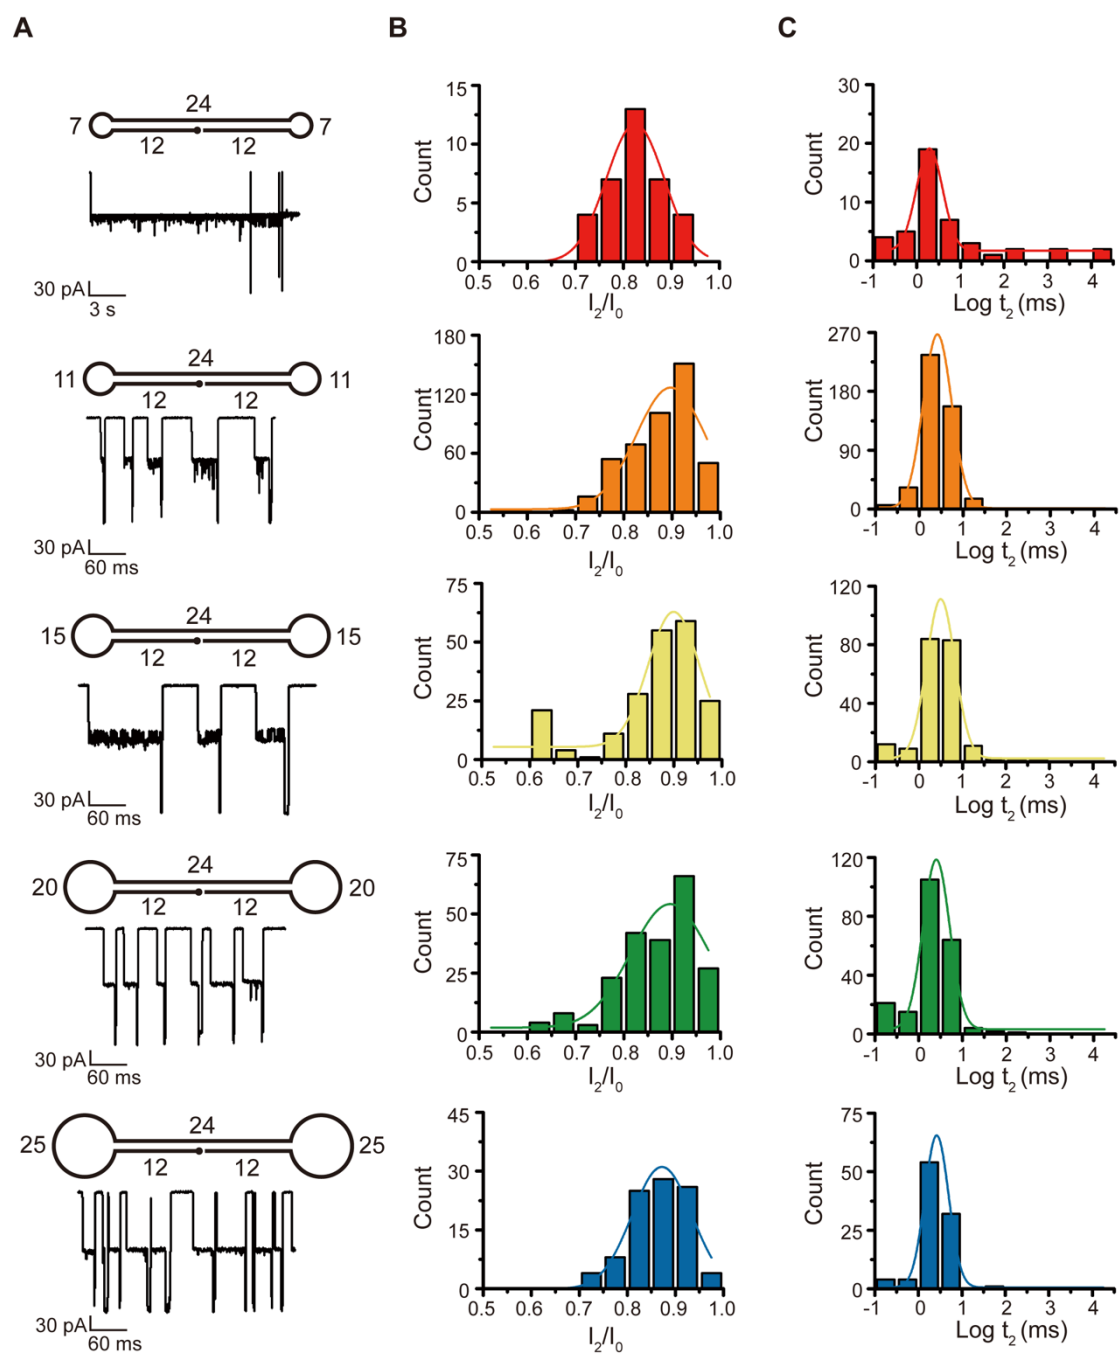

**Fig. S5.** Detection of dumbbell structures DNA with different loop through the MspA nanopore (level 2). (A) The structure and current trace of dumbbell DNA. (B) Histograms of current blockage. (C) Histograms of dwell time. The recording voltage was 120 mV with the buffer condition: *cis*: 0.5 M NaCl, 10 mM Tris, pH 8.0; *trans*: 3 M NaCl, 10 mM Tris pH 8.0.

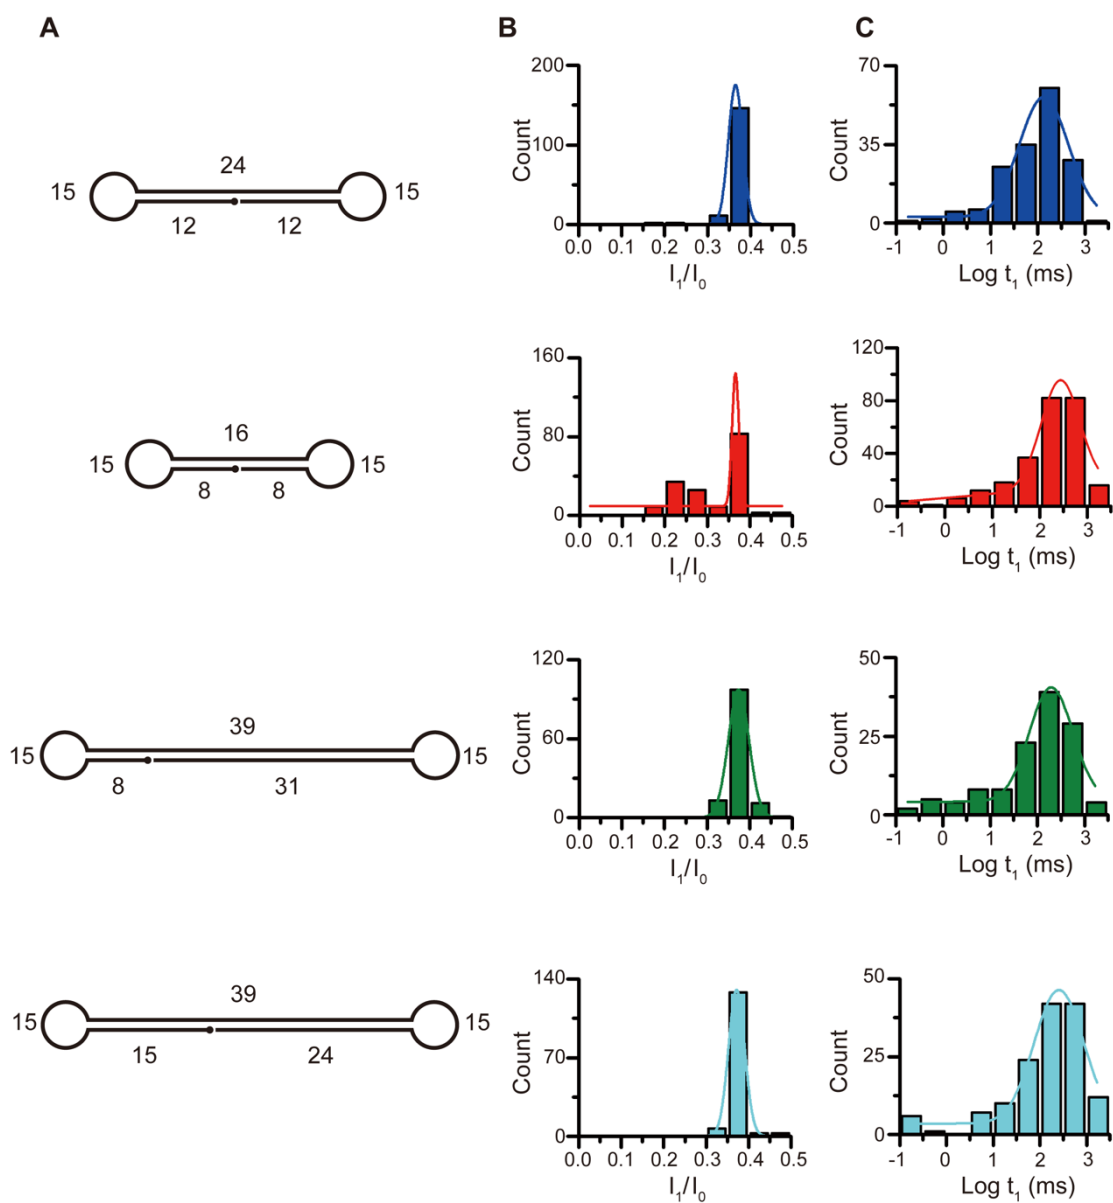

**Fig. S6.** Detection of dumbbell structure DNA with different stem length through the MspA nanopore (level 1). (A) The structure of dumbbell DNA. (B) Histograms of current blockage. (C) Histograms of dwell time. The recording voltage was 120 mV with the buffer condition: *cis*: 0.5 M NaCl, 10 mM Tris, pH 8.0; *trans*: 3 M NaCl, 10 mM Tris pH 8.0.

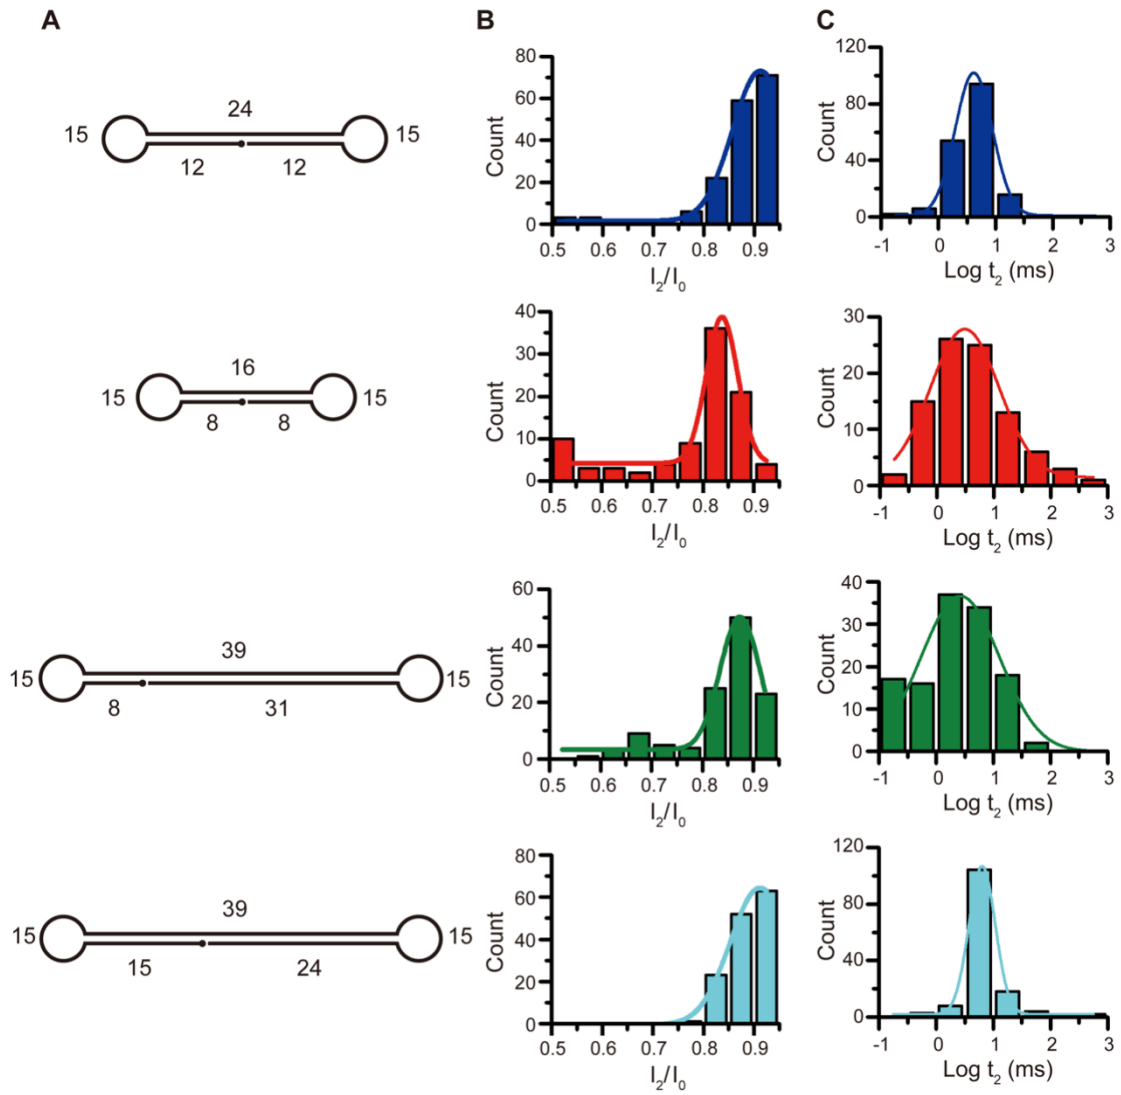

**Fig. S7.** Detection of dumbbell structures DNA with different stem through the MspA nanopore (level 2). (A) The structure of dumbbell DNA. (B) Histograms of current blockage. (C) Histograms of dwell time. The recording voltage was 120 mV with the buffer condition: *cis*: 0.5 M NaCl, 10 mM Tris, pH 8.0; *trans*: 3 M NaCl, 10 mM Tris pH 8.0.



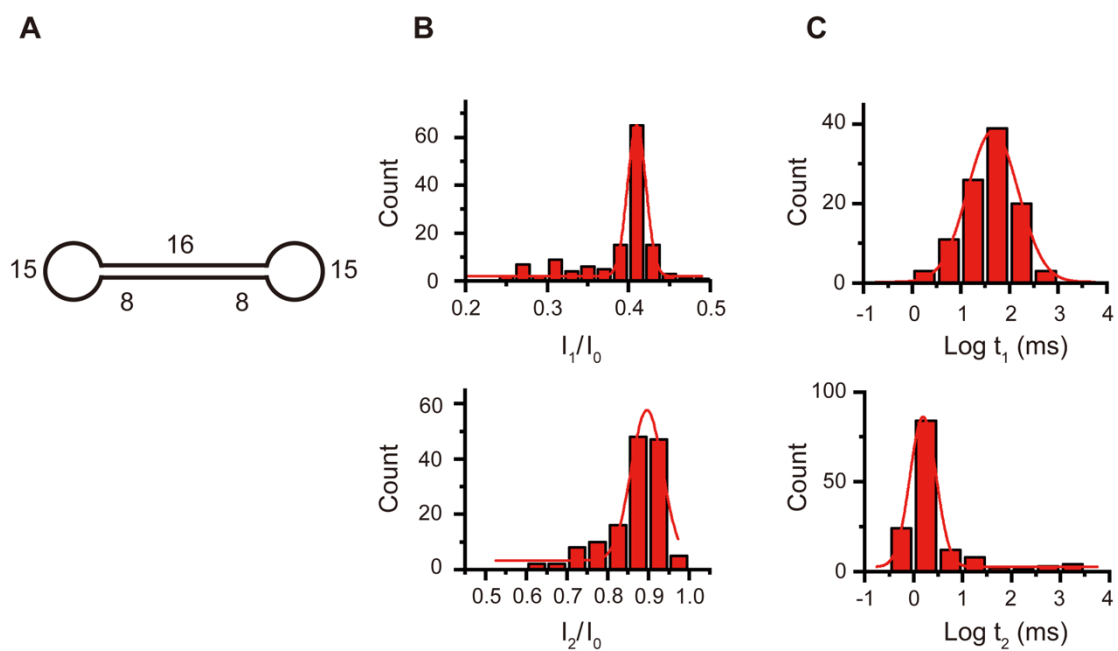

**Fig. S8.** Events of ligated dumbbell DNA with different stem length through the MspA nanopore. (A) The structure of ligated dumbbell DNA. (B) Histograms of current blockage. (C) Histograms of dwell time. The recording voltage was 120 mV with the buffer condition: *cis*: 0.5 M NaCl, 10 mM Tris, pH 8.0; *trans*: 3 M NaCl, 10 mM Tris pH 8.0.

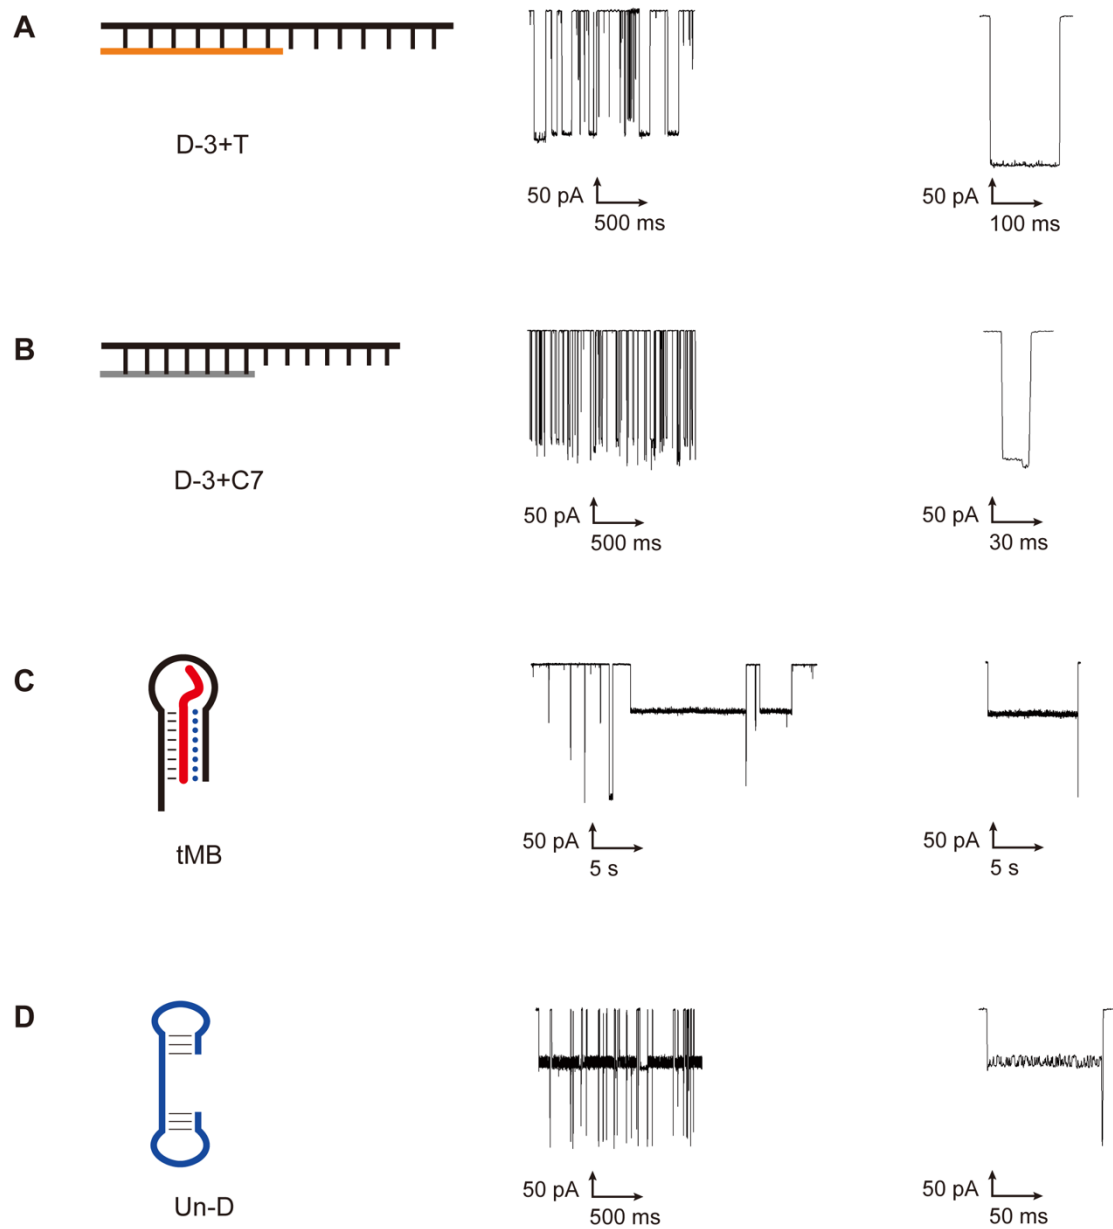

**Fig. S9.** Different structure of DNA translocation through MspA nanopore. (A) D-3+T. (B) D-3+C7. (C) tMB. (D) Un-dumbbell DNA. The recording voltage was 120 mV with the buffer condition: *cis*: 0.5 M NaCl, 10 mM Tris-HCl, pH 8.0; *trans*: 3 M NaCl, 10 mM Tris-HCl, pH 8.0.

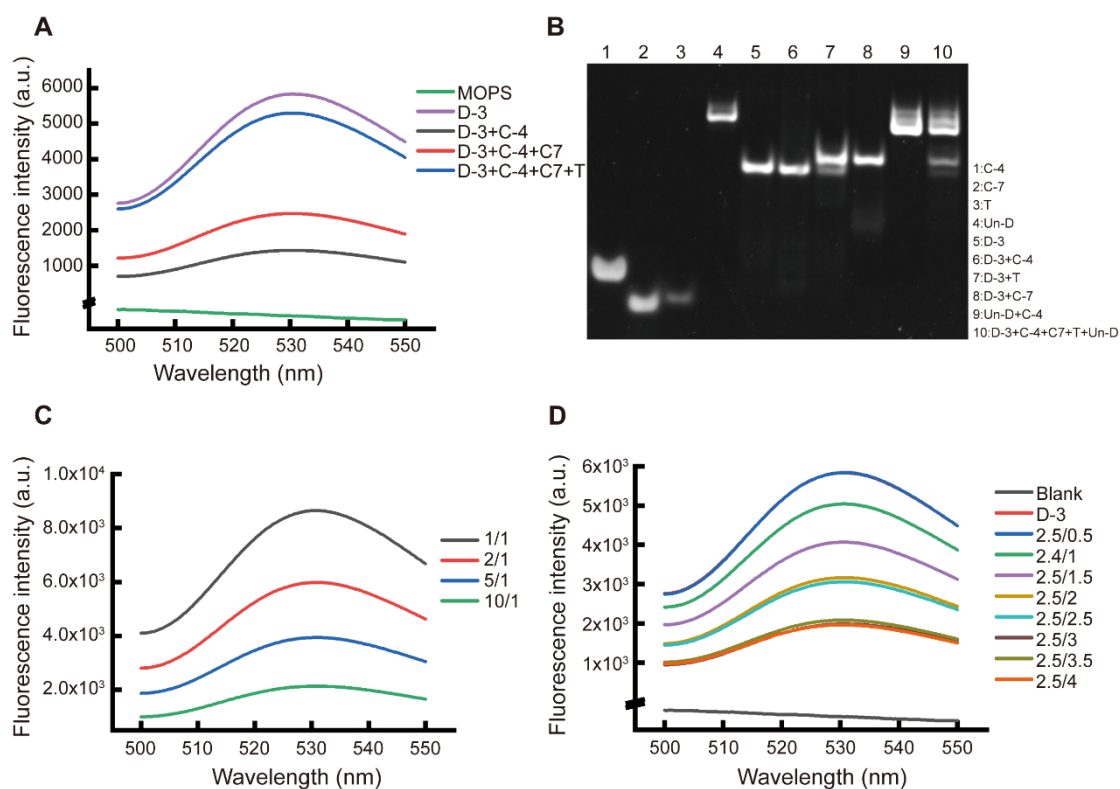

**Fig. S10.** Feasibility and optimization of the experimental condition in SNP detection. (A) UV-vis absorption of tMB. (B) Native polyacrylamide gel electrophoresis analysis of dumbbell DNA. (C) Fluorescence emission spectra of the method using different concentrations ratio of C7 and B-D-3+C-4. (D) Fluorescence emission spectra of the method using different concentrations of B- D-3 and C-4.

**Table S1.** The sequences of hairpin and dumbbell DNA used in this study

---

| Name<br>(Structure-loop-stem-toehold) | Sequence (5'-3')                                                           |
|---------------------------------------|----------------------------------------------------------------------------|
| H-15-19-6                             | GTATGAGCGCTCATAACGTTTCATTTCTCAGCAACGTATGA<br>GCGCTCATAACGTTTCAT            |
| H-13-19-6                             | GTATGAGCGCTCATAACGTTTCATCTCAGCAACGTATGAGC<br>GCTCATAACGTTTCAT              |
| H-11-19-6                             | GTATGAGCGCTCATAACGTTTCCTCAGCAACGTATGAGCG<br>CTCATAACGTTTCAT                |
| H-9-19-6                              | GTATGAGCGCTCATAACGTTTCATTTCTCAGCAACGTATGAGCGCT<br>CATAACGTTTCAT            |
| H-7-19-6                              | GTATGAGCGCTCATAACGTTTCATCAGCAACGTATGAGCGCTCA<br>TACGTTTCAT                 |
| H-15-19-11                            | GTATGAGCGCTCATAACGTTTCATTTCTCAGCAACGTATGA<br>GCGCTCATAACGTTTCATTTTTT       |
| H-15-19-16                            | GTATGAGCGCTCATAACGTTTCATTTCTCAGCAACGTATGA<br>GCGCTCATAACGTTTCATTTTTTTTTTTT |
| H-15-15-6                             | GTATGAGCGCTCATAACATTTCTCAGCTATGAGCGCTCAT<br>ACGTTTCAT                      |
| H-15-11-6                             | GTATGAGCGCTCATTTCATTTCTCAGCAGCGCTCATAACGTTTCAT                             |
| D-15-8-16                             | CATAACGTTTCATTTCTCAGCAACGTATGCTCATAACCCATT<br>CATTTCTCAGCGGTATGAG          |
| D-7-12-24                             | CGCTCATAACGTTTCATCAGCAACGTATGAGCGCACGTATGAGC<br>GCATCAGCCGCTCATAACGTG      |
| D-11-12-24                            | CGCTCATAACGTTTCCTCAGCAACGTATGAGCGCACGTAT<br>GAGCGCATTTCTCAGCCGCTCATAACGTG  |

---

---

|            |                                                                                                                        |
|------------|------------------------------------------------------------------------------------------------------------------------|
| D-15-12-24 | CGCTCATACTTCATTTCATTTCTCAGCAACGTATGAGCGCAC<br>GTATGAGCGCATTTCATTTCTCAGCCGCTCATACTG                                     |
| D-20-12-24 | CGCTCATACTTCATTTCATTTTTTTTTCTCAGCAACGTATGAGC<br>GCACGTATGAGCGCATTTCATTTTTTTTTCTCAGCCGCTCATACT<br>TG                    |
| D-25-12-24 | CGCTCATACTTCATTTCATTTTTTTTTTTTTCTCAGCAACGTAT<br>GAGCGCACGTATGAGCGCATTTCATTTTTTTTTTTTTCTCAGCC<br>GCTCATACTG             |
| D-30-12-24 | CGCTCATACTTCATTTCATTTTTTTTTTTTTTTTTCTCAGCAA<br>CGTATGAGCGCACGTATGAGCGCATTTCATTTTTTTTTTTTTTTT<br>TTCTCAGCCGCTCATACTG    |
| D-15-8-39  | CATACGTTCATTTCATTTCTCAGCAACGTATGTAAAGTGCTTAT<br>AGTGCAGGTAGAACGTATGCATTTCATTTCTCAGCCATACGTTC<br>TACCTGCACTATAAGCACTTA  |
| D-15-15-39 | TGAAGTGCATACGTTCATTTCATTTCTCAGCAACGTATGCACTT<br>CACTTATAGTGCAGGTAGAACGTATGCATTTCATTTCTCAGCCA<br>TACGTTCTACCTGCACTATAAG |
| Un-15-8-23 | CATACGTTCATTTCATTTCTCAGCAACGTATGTAAAGTGCTTAT<br>AGTGCAGGTAGAACGTATGCATTTCATTTCTCAGCCATACGTTC                           |
| Un-15-15-9 | TGAAGTGCATACGTTCATTTCATTTCTCAGCAACGTATGCACTT<br>CACTTATAGTGCAGGTAGAACGTATGCATTTCATTTCTCAGCCA<br>TACGTTCTACCTG          |
| T          | GCTCCCCGCACCGGCCCATC                                                                                                   |
| TM1        | GCTGCCCCGCACCGGCCCATC                                                                                                  |
| TM2        | CCTCCCCGCACCGGCCCATC                                                                                                   |
| TM3        | GCTCCCCGCA GCGGCCCATC                                                                                                  |
| TM4        | GCTCCCCGCACCGGCCGATC                                                                                                   |
| TM5        | GCTCCCCGCACCGGCCCATG                                                                                                   |
| C-4        | AAAAAAAAAGGGGGGGGGGGGG                                                                                                 |
| D-3        | AGCTTTTTTT TTGATGGGCCGGTGCGGGGAGCTTT<br>TTTTTT                                                                         |

---

---

|       |                                                                                                |
|-------|------------------------------------------------------------------------------------------------|
| B-D-3 | FAM-AGCTTTTTTT<br>TTGATGGGCCGGTGCGGGGAGCTTT<br>TTTTTT-BHQ                                      |
| C7    | AAAAAGCTCCCCGCACCGGC                                                                           |
| Un-D  | CATACGTTTCATTCATTTCTCAGCAACGTATGCC<br>CCCCCC CCCCTTTTTT TTTAACGTATGCATTCAT<br>TTCTCAGCCATACGTT |

---
